# Supplementary material
Source: PubMed Central journal article supplement (PMC3690122)
Supplement: NIHMS461582-supplement-supplement_1.pdf [file NIHMS461582-supplement-supplement_1.pdf]

**APPENDIX E1.**

Survey about ED HIV counseling and testing.

**Intentions**

- 1) Do you plan on making any changes in your life as a result of our conversation today?  
 Yes  No  Not Sure  declines to answer  
 1b) If yes, what changes do you plan to make, what is your plan? (record exact wording)  
 declines to answer
- 2) Why do you (not) want to make changes? (record exact wording)  
 declines to answer
- 3) Do you plan to get another HIV test in the next 3 to 6 months?  
 Yes  No  Not Sure  declines to answer
- 4) Are you going to talk to your sex or needle-sharing partners about HIV?  
 Yes  No  Not Sure  declines to answer  not applicable

**Perceptions of HIV Counseling**

- 5) Did you think that talking today about HIV will help you to improve your health?  
 Yes  No  Not Sure  declines to answer
- 6) If we did not discuss HIV risk and prevention and only provided information about the test itself, would you still have taken the HIV test?  
 Yes  No  Not Sure  declines to answer
- 7) Would you have preferred to get the test *without* our longer discussion about HIV risk and prevention?  
 Yes  No  Not Sure  declines to answer
- 8) If we had given you the HIV test today without any information and then asked you to go somewhere else to talk about HIV risk and prevention, would you have done this?  
 Yes  No  Not Sure  declines to answer

**ED Role**

- 9) Were you comfortable with your privacy when you were talking about HIV?  
 Yes  No  Not Sure  declines to answer
- 10) Were you able to ask all of your questions about HIV and have them answered?  
 Yes  No  Not Sure  declines to answer
- 11) Have been tested for HIV before?  
 Yes  No  Not Sure  declines to answer  
 If yes  
 11a) was this in the ED  
 Yes  No  Not Sure  declines to answer

**Readiness to Change<sup>26</sup>**

I am now going to read a series of statements as if you were saying them. Please tell me if you think they are true or false for you.

- 1) I don't think I am at risk for HIV.  
 True  False  declines to answer
- 2) I am trying to use methods that reduce my risk for HIV.  
 True  False  declines to answer
- 3) Sometimes I think I need to better protect myself from getting HIV.  
 True  False  declines to answer
- 4) It is a waste of time worrying about getting HIV.  True  
 False  declines to answer

- 5) I have just recently changed my sexual and or drug habits (using condoms, getting tested, etc.).  
 True  False  declines to answer
- 6) Anyone can talk about not wanting to get HIV, but I am actually doing something about it.  
 True  False  declines to answer
- 7) I am at the point where I should think about protecting myself from getting HIV.  
 True  False  declines to answer
- 8) Not protecting myself from HIV is a problem.  
 True  False  declines to answer
- 9) There is no need for me to protect myself from HIV.  
 True  False  declines to answer
- 10) I am actually changing my HIV prevention methods now.  
 True  False  declines to answer
- 11) Ways to reduce my risk for HIV would be pointless for me.  
 True  False  declines to answer

## SURVEY ABOUT ED HIV COUNSELING AND TESTING

### Intentions

- 1) Do you plan on making any changes in your life as a result of our conversation today:  
 Yes  No  Not Sure  declines to answer
- 2) Why do you (not) want to make changes? (record exact wording)  
 declines to answer
- 1b) If yes, what changes do you plan to make, what is your plan? (record exact wording)  
 declines to answer
- 3) Do you plan to get another HIV test in the next 3 to 6 months?  
 Yes  No  Not Sure  declines to answer
- 4) Are you going to talk to your sex or needle sharing partners about HIV?  
 Yes  No  Not Sure  declines to answer  not applicable

### Perceptions of HIV Counseling

- 5) Did you think that talking today about HIV will help you to improve your health?  
 Yes  No  Not Sure  declines to answer
- 6) If we did not discuss HIV risk and prevention and only provided information about the test itself, would you still have taken the HIV test?  
 Yes  No  Not Sure  declines to answer
- 7) Would you have preferred to get the test WITHOUT our longer discussion about HIV risk and prevention?  
 Yes  No  Not Sure  declines to answer
- 8) If we had given you the HIV test today without any information, and then asked you to go somewhere else to talk about HIV risk and prevention, would you have done this?  
 Yes  No  Not Sure  declines to answer

### ED Role

- 9) Were you comfortable with your privacy when you were talking about HIV?  
 Yes  No  Not Sure  declines to answer
- 10) Were you able to ask all of your questions about HIV and have them answered?  
 Yes  No  Not Sure  declines to answer
- 11) Have been tested for HIV before?  
 Yes  No  declines to answer  
If yes
  - 11a) was this in the ED  
 Yes  No  Not Sure  declines to answer

**Table E1.** Knowledge quiz responses before and after counseling.\*

| Category/Question                                             | % Correct |          | Difference, % | 95% CI         |
|---------------------------------------------------------------|-----------|----------|---------------|----------------|
|                                                               | Pretest   | Posttest |               | Lower, Upper   |
| <b>Benefits of testing</b>                                    |           |          |               |                |
| Live longer with current drug treatments                      | 83.0      | 81.9     | -1.1          | (-0.07, -0.04) |
| <b>Definition of HIV/AIDS</b>                                 |           |          |               |                |
| People can get AIDS without getting HIV                       | 60.6      | 67.0     | 6.4           | (-0.04, -0.17) |
| Infected with HIV does not mean AIDS                          | 69.4      | 82.7     | 13.3          | (0.03, -0.23)  |
| <b>HIV prevention</b>                                         |           |          |               |                |
| Can give HIV to baby through breastfeeding                    | 79.8      | 83.0     | 3.2           | (-0.05, -0.11) |
| HIV is destroyed by bleach                                    | 29.2      | 41.7     | 12.5          | (0.03, -0.22)  |
| <b>HIV transmission</b>                                       |           |          |               |                |
| Cannot get HIV by donating blood                              | 46.4      | 63.9     | 17.5          | (0.06, -0.29)  |
| Get HIV from needle sharing, only give through needle sharing | 67.0      | 71.0     | 4.0           | (-0.04, -0.12) |
| Coins, such as quarters or nickels, can carry HIV             | 90.7      | 94.8     | 4.1           | (-0.03, -0.12) |
| HIV by having oral sex                                        | 88.8      | 94.9     | 6.1           | (-0.01, -0.14) |
| Only prevent HIV from intravenous drugs by quitting           | 46.4      | 59.8     | 13.4          | (0.03, -0.23)  |
| No sex only way to reduce risk of HIV                         | 50.0      | 60.0     | 10.0          | (0.00, -0.19)  |
| Prevent HIV by washing genitals or private parts              | 88.0      | 91.0     | 3.0           | (-0.04, -0.10) |
| <b>HIV testing</b>                                            |           |          |               |                |
| Infected for 5 y or more without getting AIDS                 | 81.3      | 88.5     | 7.2           | (-0.01, -0.16) |
| Infected 1 week ago means negative HIV test                   | 47.4      | 74.2     | 26.8          | (0.16, -0.36)  |
| Negative test should be repeated in 3-6 mo                    | 96.0      | 100.0    | 4.0           | (0.00, -0.10)  |
| <b>Rapid HIV testing</b>                                      |           |          |               |                |
| Rapid positive HIV test result, may not have HIV              | 41.4      | 57.5     | 16.1          | (0.04, -0.28)  |

\*Differences in the proportion of correct responses between before and after counseling and 95% CI for those differences are shown.

**Table E2.** Change in behavior for patients undergoing repeated testing in an ED-based HIV counseling and testing program.\*

| Behavior                         | Participating in Behavior, No. | Increasing Risk, % | No Change, % | Decreasing Risk, % |
|----------------------------------|--------------------------------|--------------------|--------------|--------------------|
| Sex with a man                   | 184                            | 28                 | 49           | 23                 |
| Sex with a woman                 | 179                            | 25                 | 50           | 26                 |
| Oral sex                         | 285                            | 24                 | 54           | 22                 |
| Anal sex                         | 85                             | 44                 | 15           | 41                 |
| Sex with at-risk partner         | 106                            | 35                 | 7            | 58                 |
| Sex with HIV positive partner    | 5                              | 20                 | 0            | 80                 |
| Sex while intoxicated            | 223                            | 37                 | 26           | 37                 |
| Sex exchanged for drugs or money | 58                             | 47                 | 14           | 40                 |
| Injection drug use               | 24                             | 21                 | 21           | 58                 |
| Crack use                        | 28                             | 36                 | 29           | 36                 |

\*The percentage change reflects a change defined by beginning or ending an activity during the year and, for sex behaviors, altered frequency of condom use.
